# Supplementary material
Source: PubMed Central journal article supplement (PMC4091601)
Supplement: psb-9-e28502-s01.pdf [file psb-9-e28502-s01.pdf]

## **Supplemental Material to:**

**Kumar K, Sinha AK**

**Genome-wide transcriptome modulation in rice  
transgenic lines expressing engineered mitogen activated  
protein kinase kinase 6**

**Plant Signaling & Behavior 2013; 9(3)**

**<http://dx.doi.org/10.4161/psb.28502>**

**[www.landesbioscience.com/journals/psb/article/28502](http://www.landesbioscience.com/journals/psb/article/28502)**

Supplemental Figure S1

Supplemental Table S1

Supplemental Table S2

## Supplementary Information

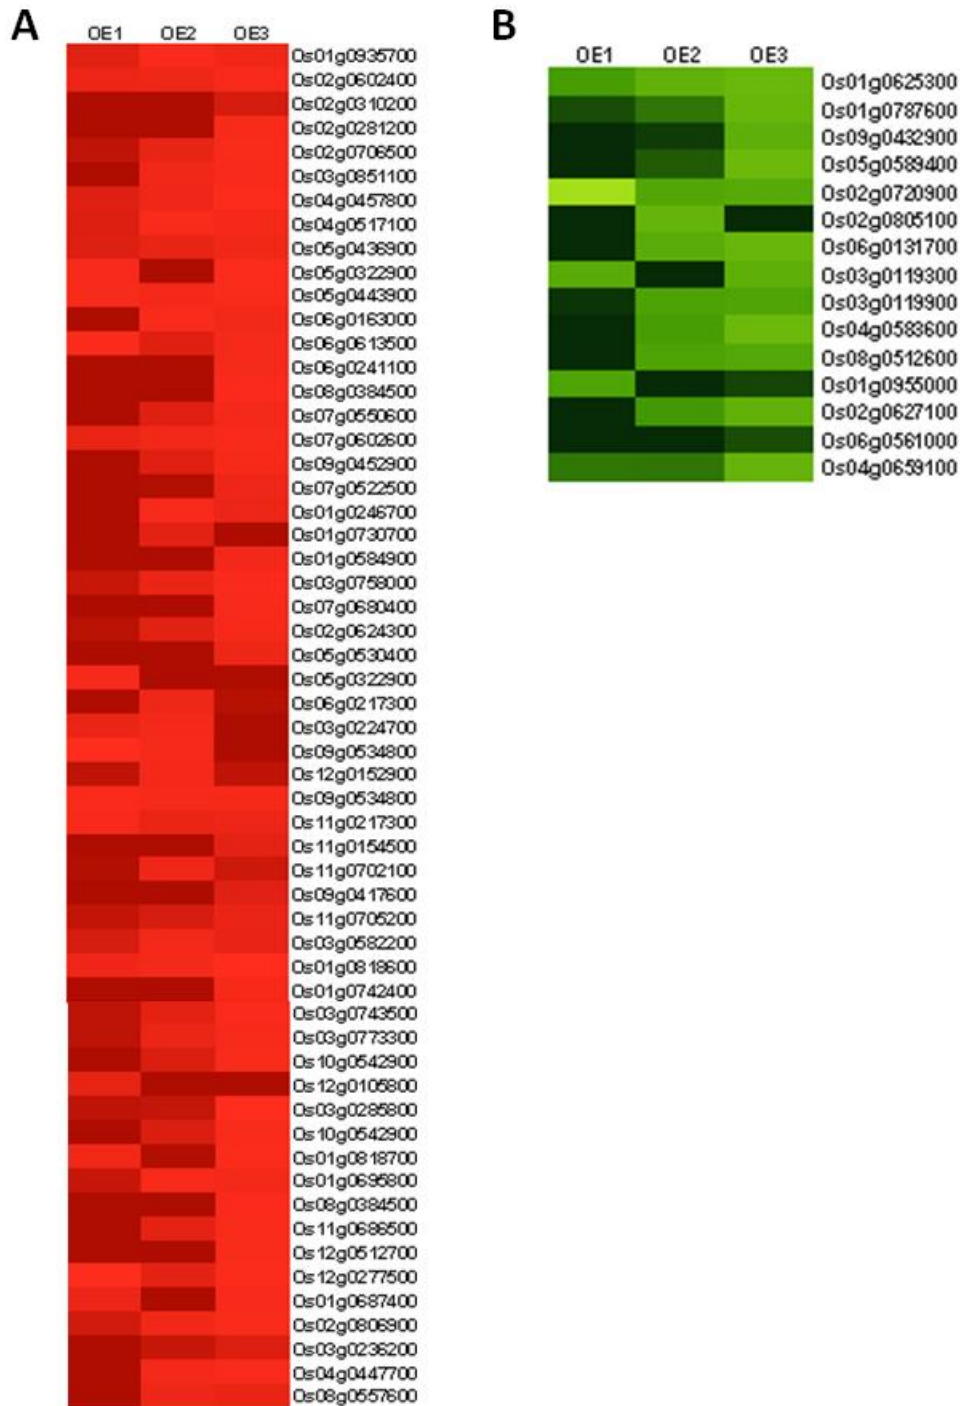

Figure S1.

Figure S1. A heat map showing expression of selected 72 genes that showed at least more than 2-fold expression difference in *OsMKK6<sup>EE</sup>* overexpressed transgenic lines compared to wild-type PB-1 rice plants in the absence of stress treatments. The affected genes were divided into two clusters (A) Cluster I represents upregulated genes, genes showing ratio of >2 (upregulated in 3 transgenic overexpressed lines designated as OE1, OE2 and OE3 samples) and (B) Cluster II represents downregulated genes showing ratio less than 0.5 (downregulated in 3 transgenic overexpressed lines designated as OE1, OE2 and OE3 samples).

**Table S1** Some common up-regulated and down-regulated genes in overexpressed rice plant

**Upregulated genes**

**S.No.    Accession No.    Gene name**

**Transcription**

|   |              |                                                      |
|---|--------------|------------------------------------------------------|
| 1 | Os01g0935700 | Cytochrome c1, heme protein, mitochondrial precursor |
| 2 | Os02g0602400 | Mitochondrial transcription termination factor       |
| 3 | Os02g0310200 | FDRMADS6                                             |
| 4 | Os02g0281200 | NB-ARC domain containing protein                     |

- 5 Os02g0706500 ATPase, AAA family protein
- 6 Os03g0851100 Elongation factor Tu, mitochondrial precursor
- 7 Os04g0457800 BRASSINOSTEROID INSENSITIVE 1-associated receptor kinase  
1 precursor
- 8 Os04g0517100 Myb-related protein Myb4
- 9 Os05g0436900 DHHC zinc finger domain containing protein
- 10 Os05g0322900 WRKY DNA binding domain containing protein
- 11 Os05g0443900 Basic leucine zipper protein (liguleless2)
- 12 Os06g0163000 U-box domain containing protein
- 13 Os06g0613500 bHLH transcription factor
- 14 Os06g0241100 Protein kinase domain containing protein
- 15 Os08g0384500 PDR-type ABC transporter
- 16 Os07g0550600 Transferase family protein
- 17 Os07g0602600 RNA recognition motif family protein
- 18 Os09g0452900 Avr9 elicitor response protein
- 19 Os07g0522500 NtPDR1 for pleiotropic drug resistance like protein
- 20 Os01g0246700 WRKY6
- 21 Os01g0730700 WRKY69
- 22 Os01g0584900 WRKY50
- 23 Os03g0758000 WRKY57
- 24 Os07g0680400 WRKY54
- 25 Os02g0624300 myb factor

- 26 Os05g0530400 Spl7 mRNA for heat stress transcription factor Spl7
- 27 Os05g0322900 ABA (chilling-regulated) mRNA
- 28 Os06g0217300 MADS box-like protein
- 29 Os03g0224700 Heat shock factor 3
- 30 Os09g0534800 Transcription factor TFIIB (TFIIB)
- 31 Os12g0152900 bZIP transcription factor (AtbZIP21 gene)
- 32 Os09g0534800 Transcription initiation factor IIB
- 33 Os11g0217300 GHMP kinases putative ATP-binding protein
- 34 Os11g0154500 NAC-domain containing protein 90
- 35 Os11g0702100 Xylanase inhibitor protein 1 precursor
- 36 Os09g0417600 WRKY DNA binding domain containing protein
- 37 Os11g0705200 GRAS family transcription factor containing protein
- 38 Os03g0582200 Secretary carrier-associated membrane protein

### **Cell signalling**

- 39 Os01g0818600 Protein kinase domain containing protein
- 40 Os01g0742400 Leucine Rich Repeat family protein
- 41 Os03g0743500 Calmodulin
- 42 Os03g0773300 Wound and phytochrome signaling involved receptor like kinase
- 43 Os10g0542900 Acidic 27 kDa endochitinase precursor / jasmonic acid and ethylene-dependent systemic resistance
- 44 Os12g0105800 Protein kinase family protein/ transmembrane receptor protein tyrosine kinase
- 45 Os03g0285800 MAP kinase 1

|    |              |                                                                      |
|----|--------------|----------------------------------------------------------------------|
| 46 | Os10g0542900 | Chitinase                                                            |
| 47 | Os01g0818700 | Putative receptor protein kinase                                     |
| 48 | Os01g0695800 | Multidrug resistance protein 1 homolog, putative/ ATPase activity    |
| 49 | Os08g0384500 | PDR-type ABC transporter 1, putative, expressed / lead ion transport |
| 50 | Os11g0686500 | NB-ARC domain containing protein                                     |
| 51 | Os12g0512700 | PDR-like ABC transporter                                             |
| 52 | Os12g0277500 | RuBisCO subunit binding-protein alpha subunit, chloroplast precursor |

### **Metabolic pathway**

|    |              |                                                                                                                     |
|----|--------------|---------------------------------------------------------------------------------------------------------------------|
| 53 | Os01g0687400 | Acidic endochitinase precursor                                                                                      |
| 54 | Os02g0806900 | Aminotransferase, classes I and II family protein, expressed / serine C-palmitoyltransferase activity               |
| 55 | Os03g0236200 | Glutamate decarboxylase                                                                                             |
| 56 | Os04g0447700 | NADH-dependent oxidoreductase 2                                                                                     |
| 57 | Os08g0557600 | Monodehydroascorbate reductase, putative, expressed / dihydrolipoyl dehydrogenase / thioredoxin-disulfide reductase |

### **Downregulated genes**

**S.No.                      Accession No.              Gene name**

#### **Transcription**

|   |              |                                                |
|---|--------------|------------------------------------------------|
| 1 | Os01g0625300 | HSF-type DNA-binding domain containing protein |
| 2 | Os01g0787600 | Hydrolase, alpha/beta fold family protein      |
| 3 | Os09g0432900 | Hypro1                                         |

|   |              |                                             |
|---|--------------|---------------------------------------------|
| 4 | Os05g0589400 | MCB2 protein                                |
| 5 | Os02g0720900 | Eukaryotic aspartyl protease family protein |
| 6 | Os02g0805100 | Auxin-responsive protein (IAA2)             |
| 7 | Os06g0131700 | OsNAC7 protein                              |
| 8 | Os03g0119300 | Subtilisin N-terminal region family protein |

### Cell communication

|    |              |             |
|----|--------------|-------------|
| 9  | Os03g0119900 | Histone H4  |
| 10 | Os04g0583600 | Histone H4  |
| 11 | Os08g0512600 | cdc2 kinase |

### Metabolism

|    |              |                                             |
|----|--------------|---------------------------------------------|
| 12 | Os01g0955000 | Phosphoesterase family protein              |
| 13 | Os02g0627100 | Phenylalanine ammonia-lyase                 |
| 14 | Os06g0561000 | Inositol oxygenase                          |
| 15 | Os04g0659100 | Glutamine synthetase, chloroplast precursor |

### Supplementary information

**Table S2.** List of primers used for qRT-PCR analysis

| S. No. | Genes | Primer Sequence                                          |
|--------|-------|----------------------------------------------------------|
| 1      | Actin | 5' CGGTGTGATGGTTGGTATGG 3'<br>5' GCCTCAGTCAGCAACACAGG 3' |
| 2      | MKK6  | 5' TCCGAGGAAACTGCAGATGA 3'                               |

|    |        |                                                               |
|----|--------|---------------------------------------------------------------|
|    |        | 5' TTTGCGAACTGCCTCTTGAA 3'                                    |
| 3  | APX    | 5' TGGTCACACCCTGGGAAGAT 3'<br>5' GTCCAGGCTCCCTCAAAGC 3'       |
| 4  | PR1    | 5' GGCGACTGCAGCCTGATC 3'<br>5' GAAGAGGTTCTCGCCAAGGTT 3'       |
| 5  | RbCs   | 5' GCCACCCAGGTCGTCAAG 3'<br>5' ATGCATCAGGGTACGCCTTCT 3'       |
| 6  | SalT   | 5' GGAGTCCCAAATGGAAAGGAA 3'<br>5' CCAACGACATGGCCAGAGT 3'      |
| 7  | Lip9   | 5' GCCGGCTACAGAGGAAGTGA 3'<br>5' TCCATGATCTTGCCCAAGTATAACC 3' |
| 8  | WRKY50 | 5' TGGGCCGTACAGGAATGG 3'<br>5' TTGATTCAGGTCGCCTTGGT 3'        |
| 9  | ABA    | 5' CTTGACCTTGGCTCGATCGT 3'<br>5' TGGTGCCCCATTTCCACTA 3'       |
| 10 | DREB1  | 5' TCTGGTCACTTTCAACACGCTATT 3'<br>5' CTCAGCGCCATCCATGTCT 3'   |
| 11 | MAPK1  | 5' CACCGACCTCCATCACATCA 3'<br>5' CTGGCAGTGCTCTTCTGACAGT 3'    |
